# Supplementary material for: Preparation and electrochemical characteristics of electrospun water-soluble resorcinol/phenol-formaldehyde resin-based carbon nanofibers
Source: Royal Society of Chemistry journal article supplement (doi:10.1039/c5ra02984h), 2015-01-01
Supplement: c5ra02984h1.pdf [file c5ra02984h1.pdf]

Electronic Supplementary Information for

**Preparation and electrochemical characteristics of electrospun water-soluble resorcinol/phenol-formaldehyde resin-based carbon nanofibers**

**Xiaodong Tian,<sup>a,b</sup> Ning Zhao,<sup>a</sup> Kai Wang,<sup>a,b</sup> Defang Xu,<sup>a,b</sup> Yan Song,<sup>\*a</sup> Quanguo Guo,<sup>a</sup> and Lang Liu<sup>a</sup>**

<sup>a</sup> Key Laboratory of Carbon Materials, Institute of Coal Chemistry, Chinese Academy of Sciences, Taiyuan 030001, China

<sup>b</sup> University of Chinese Academy of Sciences, Beijing 100049, China

Corresponding author:

Name: Yan Song

Key Laboratory of Carbon Materials, Institute of Coal Chemistry, Chinese Academy of Sciences, Taiyuan 030001, China

Tel: +863512021135; Fax: +862021135

E-mail: yansong1026@126.com

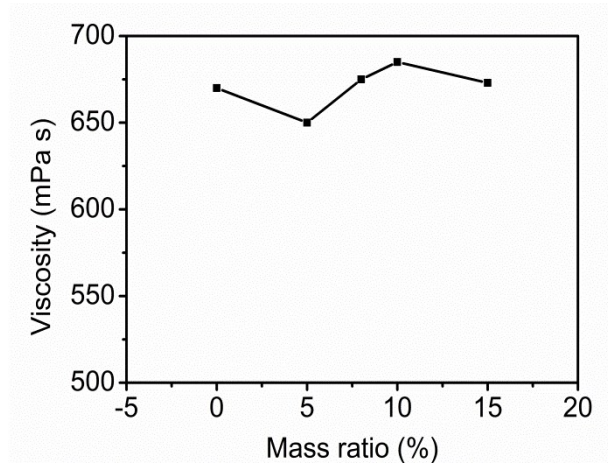

Fig. S1 The viscosity changes of the spinning solution with different KOH content.

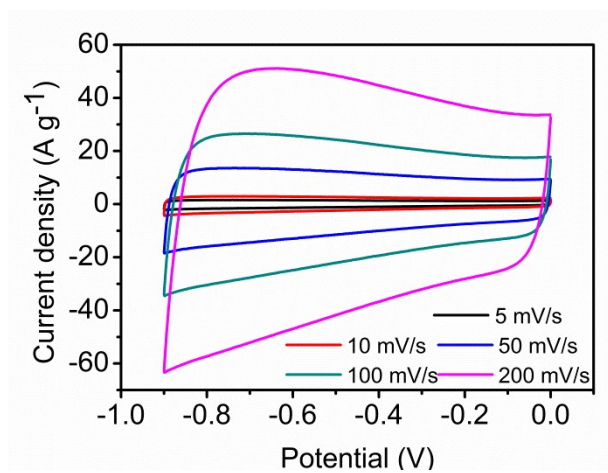

Fig. S2 CV curves of PCNF-K-15 electrode at different scan rates.

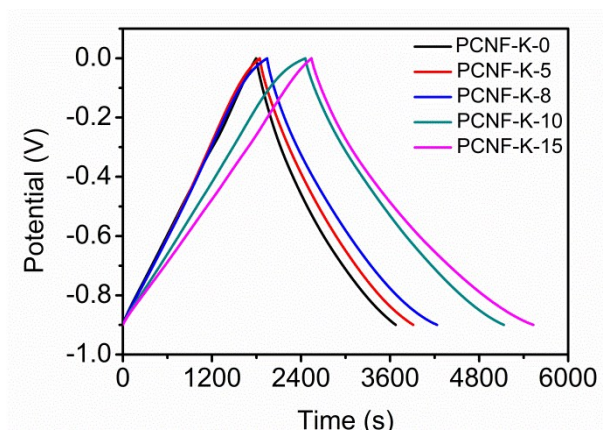

Fig. S3 GCD curves of the obtained samples at current density  $0.1 \text{ A g}^{-1}$ .

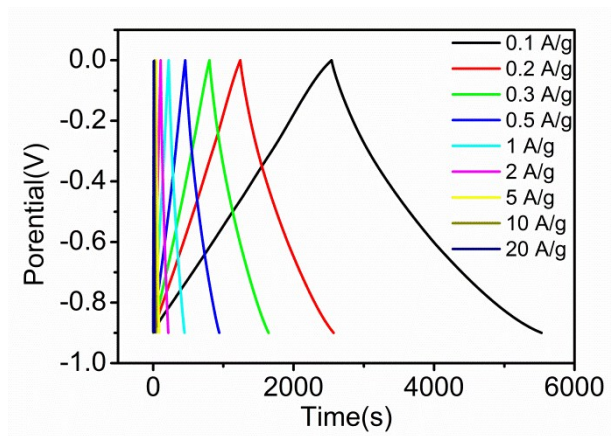

Fig. S4 GCD curves of PCNF-K-15 electrode at different current densities.
